1           **HEARING MORE TO HEAR LESS: A SCOPING REVIEW OF HEARING AIDS FOR TINNITUS RELIEF**

2           *dr. Laure Jacquemin<sup>1,2</sup>, Prof. dr. Annick Gilles<sup>1,2,3</sup>, Prof. dr. Raj Shekhawat<sup>4,5,6</sup>*

3

4    1. *University Department of Otorhinolaryngology and Head & Neck surgery, Antwerp*  
5       *University Hospital, Edegem, Belgium*

6    2. *Department of Translational Neurosciences, Faculty of Medicine and Health Sciences,*  
7       *Antwerp University, Wilrijk, Belgium*

8    3. *Department of Education, Health & Social Work, University College Ghent, Ghent, Belgium*

9    4. *College of Nursing and Health Sciences, Flinders University, Bedford Park, SA, Australia*

10   5. *Tinnitus Research Initiative, Regensburg, Germany*

11   6. *Ear Institute, University College London, UK*

12

13   ***All correspondence should be addressed to:***

14    *Prof. dr. Raj Shekhawat*

15    *Flinders Medical Centre GPO Box 2100, Adelaide 5001, South Australia*

16    [giriraj.shekhawat@flinders.edu.au](mailto:giriraj.shekhawat@flinders.edu.au) / +61 8 72218918

17   ***Financial disclosures/conflicts of interest:***

18    *There are no conflicts of interest, financial, or otherwise.*

19 **Abstract**

20 **Background**

21 Tinnitus, the perception of a sound in absence of an external auditory source, can significantly  
22 impact ones' quality of life. As tinnitus is often associated with hearing loss, hearing aids have  
23 been proposed for tinnitus relief in literature for more than 70 years. While there is a long history  
24 of clinical work and research on this topic, there is a need for recent literature to be reviewed and  
25 guide decision making in tinnitus management.

26 **Objective**

27 The aim of this scoping review is to provide an update of the available evidence on hearing aids  
28 for tinnitus, focusing on the effect of sound amplification, to draw conclusions for clinical  
29 practice and identify gaps in the field. A consultation exercise was included to discuss current  
30 issues that practitioners and carers themselves face but remain under-researched.

31 **Design**

32 This scoping review was conducted based on the six-stage framework of Arksey et al. (2005).  
33 Studies were included if they investigated hearing aids for tinnitus and were published after 2011.  
34 Databases of PubMed and Scopus were explored on the 16th of November 2020. The search was  
35 limited to English manuscripts. A total of 28 primary research studies were selected.

36 **Results**

37 Positive results of hearing aids for tinnitus relief were shown by 68 % of the studies, whereas 14  
38 % demonstrated no change in tinnitus perception. As the quality of the evidence across studies  
39 was variable, no consensus can be reached regarding the use of hearing aids as a treatment for  
40 tinnitus. Nevertheless, recent studies were more likely to focus on optimizing the effect of  
41 hearing aids and better predicting which tinnitus patients benefit from hearing aids. The experts

42 stated that the findings were in agreement with their view on the scientific evidence and they  
43 emphasized the importance of reaching consensus.

44 Conclusions

45 The majority of the studies supported the use of hearing aids for tinnitus relief. Hence, there was  
46 some scientific support for it, but the quality of evidence was questioned. Stronger methodology  
47 in future studies is needed to reach consensus and support clinical guidelines development.

48

49 *Key words: hearing aids, sound amplification, tinnitus, scoping review, treatment*

50 **Introduction**

51 Tinnitus is the perception of a sound (e.g. sizzling, ringing or hissing) in the absence of a  
52 corresponding acoustic source (Baguley et al. 2013; Jastreboff 1990). It is a common experience  
53 (10-15% in adults) which, for some (2.4% in adults), may cause a considerable amount of distress  
54 and decreased quality of life (Axelsson et al. 1989; Baguley et al. 2013). As tinnitus has no cure  
55 and is generally associated with hearing loss, hearing aids have been proposed for tinnitus relief  
56 for more than 70 years (Saltzman et al. 1947). In 2013, Shekhawat et al. conducted a scoping  
57 review to explore the role of hearing aids in tinnitus management (Shekhawat, Searchfield and  
58 Stinear 2013). The authors concluded that some evidence had been provided for the use of  
59 hearing aids. However, the authors identified a need for stronger methodology and randomized  
60 control trials.

61 The exact working mechanism behind tinnitus relief with hearing aids is not yet fully understood.  
62 Proposed mediation factors include reduction in central gain, habituation, reduction in  
63 communication stress, altered neuronal plasticity and masking (Beck 2011; Robert W. Sweetow et  
64 al. 2010). The maladaptive neuronal gain in the central auditory system as a response to the  
65 cochlear deafferentation (i.e. central gain) might be reduced as hearing aids provide additional  
66 sensory input which was lost (Noreña 2011). This repaired input can also lead to increased  
67 neuronal activity in the auditory pathway, possibly interfering with the central processing of  
68 tinnitus (Jastreboff et al. 1993). As such, the contrast between tinnitus and background stimuli  
69 can be reduced, facilitating habituation to tinnitus. Decreased communication stress, on the other  
70 hand, as a result of hearing aids use, can support coping with tinnitus (Surr et al. 1985). A long  
71 term effect of hearing aids that has been proposed through animal studies is reversing the  
72 tinnitus-related cortical reorganization (Eggermont 2008). Finally, the model of masking suggests  
73 that hearing aids can (partially) mask the tinnitus percept and, thus, divert attention away from it  
74 to more meaningful sounds (Coles et al. 1987).

75 Masking can also be achieved by providing additional, more acceptable stimuli with a sound  
76 generator. This concept was introduced in 1976 by Vernon et al. (J. Vernon et al. 1976). Beyond  
77 masking, the potential positive effect of sound generators for tinnitus might be due to a sense of  
78 relief, habituation, neuromodulation or relaxation (Jastreboff and Hazell 1993; Noreña et al. 2005;  
79 R. W. Sweetow et al. 2010; Tass et al. 2012; J. A. Vernon et al. 2003). However, as sound therapy  
80 is often part of a more extensive tinnitus management program, such as Tinnitus Retraining  
81 Therapy (Jastreboff et al. 2000) or bimodal therapy (Luyten & Jacquemin et al. 2020), it has been  
82 difficult to draw conclusions concerning its isolated effectiveness (Sereda et al. 2018). The two  
83 approaches of amplification and sound generation can be incorporated in combination devices.

84 Previous reviews investigating the effect of sound-enriching devices (i.e. hearing aids, sound  
85 generators, combination devices) reached similar conclusions: positive results have been  
86 demonstrated in terms of tinnitus relief, however the quality of evidence is low (Hoare et al.  
87 2014; Hobson et al. 2012; Sereda et al. 2018; Tutaj et al. 2018). Hence, it seems that from 2012  
88 until 2018, no considerable improvement has been made in this field, and as such, conclusive  
89 evidence is absent.

90 The current scoping review provides an overview of all available evidence on hearing aids for  
91 tinnitus published after the scoping review by Shekhawat et al. in 2013, focusing mainly on the  
92 effect of sound amplification itself. Over the last years, considerable amount of research has been  
93 conducted in this field. As such, this scoping review might lead to new insights. A last, but  
94 essential, stage of a scoping review will be included (and was missing in Shekhawat's review),  
95 namely a consultation exercise which discusses current issues that practitioners and carers  
96 themselves face but remain under-researched. Finally, this type of review will make it possible to  
97 draw conclusions for clinical practice and identify gaps in the field from the data of different  
98 types of studies (e.g. randomized controlled trials (RCTs), retrospective studies, clinical gathered

99 data), thus without excluding studies based on their quality (Arksey and O'Malley 2005; Mays et  
100 al. 2001).

## 101 **Methods**

102 A scoping review was conducted according to the framework of Arksey and O'Malley (2005) . In  
103 order to collect all relevant primary research studies published on this topic since 2011, an  
104 advanced search was carried out using the databases of PubMed and Scopus on the 16<sup>th</sup> of  
105 November 2020, limited to English manuscripts. The title and/or abstract had to include the key  
106 words 'tinnitus' and 'hearing aid'. In figure 1, the details of the search strategy are presented.

## 107 **Results**

108 The key elements of the 28 selected primary research studies are shown in chronological order in  
109 Table 1. The studies are extensively discussed in the current section. First, the studies focusing on  
110 the primary effect of sound amplification through a hearing aid are described, after which the  
111 studies investigating the additional effect of sound masking are presented.

### 112 Hearing Aids

113 A total of 16 articles focused on fitting of hearing aids in a tinnitus population.

### 114 **Benefits of hearing aid use**

115 The additional benefit for hearing aid users with tinnitus compared to hearing aid users without  
116 tinnitus was the topic of three studies included in this scoping review. Andersson et al. (2011)  
117 described retrospectively the benefits of hearing aid use in 52 tinnitus patients and 33 non-  
118 tinnitus patients. The tinnitus group reported more aversiveness and less benefit in difficult  
119 situations with a hearing aid. As the results were mainly from patients with a low tinnitus distress,  
120 extrapolation to the tinnitus population needs caution. In addition, the low response rate (53%)  
121 might have biased the results. Furthermore, a comparison between tinnitus (n=12) and non-  
122 tinnitus patients (n=12) after hearing aid use was made by Araujo et al. (2016) in an elderly

123 population. The psychoacoustic measures of tinnitus, as well as the self-report questionnaires  
124 were assessed after 1 and 3 months of hearing aid use. The tinnitus loudness reduced  
125 significantly over time, as well as the nuisance with tinnitus and hearing loss. Moreover, all  
126 participants were satisfied with the use of hearing aids. However, tinnitus counselling was also  
127 provided during this study. Remarkably, all tinnitus patients were female. This potential gender  
128 bias might have influenced the results as it has been suggested that male and female patients  
129 respond differently to tinnitus treatments (Van der Wal et al. 2020). The most recent study on  
130 this topic was done by Zarenoc et al. (2017), who compared the effect of hearing aids on working  
131 memory, sleep and hearing problems. Their sample consisted of 46 tinnitus patients and 46 non-  
132 tinnitus patients who were followed-up until 3 months after completion of fitting in a prospective  
133 study. The tinnitus group showed a significantly larger improvement in terms of working memory  
134 (measured by the Reading Span) and self-reported sleep difficulties. Moreover, significant  
135 improvements in tinnitus distress were shown. While Araujo and Iório (2016) and Zarenoc et al.  
136 (2017) suggest a positive effect of hearing aid use on tinnitus, Andersson et al. (2011) call  
137 attention to the fact that hearing aid fitting might be more difficult in a tinnitus population due to  
138 aversiveness of sound. Moreover, the demonstrated positive effects on tinnitus can be mediated  
139 by the decrease in nuisance with hearing loss, improved sleep quality and improved cognitive  
140 function.

141 The secondary benefits in hearing-aid users who experience tinnitus were further investigated by  
142 Cabral et al. (2016) and Yokota et al. (2020). Cabral et al. (2016) showed significant changes in  
143 emotional and auditory complaints after three months of hearing aid use in 17 patients, however  
144 different questionnaires were applied before and after hearing aid use, which impedes  
145 interpretations of these results. The retrospective study by Yokota et al. (2020) evaluated changes  
146 in tinnitus distress before and 12 months after hearing-aid use in 66 patients with a primary  
147 complaint of hearing disturbance and co-existing tinnitus. Significant improvements were salient,  
148 even in patients with bilateral tinnitus who were fitted with a unilateral hearing aid. But for

149 patients with unilateral tinnitus, there was no significant improvement in case the hearing aid was  
150 worn on the contralateral side. These two studies show that tinnitus relief can be apparent, even  
151 if that was not the primary motivation for the hearing aid use.

### 152 **Fitting adjustments for tinnitus relief**

153 The effect of notch filter amplification was evaluated in three studies, all comparing this  
154 approach to conventional amplification. Two of the three studies did not report significant  
155 effects of either treatment on tinnitus perception. Strauss et al. (2015) included 20 patients with  
156 tonal tinnitus in a 3 weeks double-blind study. While more prominent improvement was shown  
157 for the notch-induced lateral inhibition, the authors did not report whether this result was  
158 significant. A more recent study by Marcrum et al. (2020) conducted a comparable study with 39  
159 adults with a primary complaint of tonal tinnitus over a period of 12 weeks. The authors reported  
160 a minimal effect of either treatment on tinnitus symptoms. However, there was no significant  
161 difference between notch filter and conventional amplification (23.8% and 33.3% meaningful  
162 benefit according to Tinnitus Handicap Inventory; THI). Yet, the group of Strauss recently  
163 conducted a second study with notched hearing aids and were able to show significant  
164 improvements (Haab et al. 2019). The goal was to evaluate this treatment on the long-term (i.e. 6  
165 months) with a control group being fitted with standard hearing aids. The group with notched  
166 hearing aids improved significantly in their Tinnitus Questionnaire (TQ) in comparison to the  
167 patients in the control group. In sum, notched acoustic stimulation was successfully integrated  
168 into patient's daily routine and might be promising. However, further studies are required to  
169 replicate these recent results. It has to be noted that a precise and robust characterization of the  
170 patients' tinnitus frequency and its' possible fluctuations over time is crucial for therapeutic  
171 success.

172 As tinnitus is often associated with a descending-slope type of hearing loss (i.e. the most  
173 common type of hearing loss), signal processing strategies improving the audibility of high-



174 frequency sounds have been evaluated in a tinnitus population. The retrospective study of Peltier  
175 et al. (2012) described the effect of Linear Frequency Transposition (LFT) in terms of tinnitus  
176 suppression for 74 patients. A total of 81% reported tinnitus suppression. However, it was not  
177 reported whether this suppression was significant. There were also no fixed time points for data  
178 collection, neither clear inclusion nor exclusion criteria. The effect of another frequency lowering  
179 technique, namely Frequency Compression (FC), was evaluated and compared to the  
180 conventional Wide Dynamic Range Compression (WDRC) in a crossover trial by Hodgson et al.  
181 (2015). While both treatments resulted in tinnitus improvements, WDRC showed larger  
182 improvements. It is important to note that every patient also received one counselling session.  
183 More recently, Frequency Translation (FT), LFT and WDRC were compared in a randomized  
184 double-blind controlled trial by Yakunina et al. (2019). A total of 94 tinnitus patients were  
185 randomized into the three groups and wore the hearing aid for three months, followed by a  
186 period of cessation for 3 months. The tinnitus perception improved for the groups post-  
187 intervention and at 3 months follow-up. However, no difference between the groups was found.  
188 Furthermore, the authors stated that the effect lasted for 3 months after stopping hearing aid use,  
189 but no analyses were conducted to compare the tinnitus perception at post intervention and  
190 follow up. While these three studies reported positive effects of frequency lowering techniques to  
191 some extent, no superiority over conventional amplification could be demonstrated.

192 Shekhawat et al. (2013) and Shetty and Pottackal (2019) focused on the fitting parameters  
193 preferred by patients for tinnitus relief. The study by Shekhawat et al. aimed to identify the  
194 optimized high frequency amplification for a first-fit. A total of 25 chronic tinnitus patients were  
195 asked to compare 13 speech files (i.e. simulating effects of a change in DSL i/o v5 prescription)  
196 in terms of their tinnitus perception. Overall, a reduction in output was most preferred. More  
197 specifically, A 6 dB reduction to the prescribed gain at 2 kHz was most preferred. There was a  
198 trend observed in which lower tinnitus pitch was associated with a preference for reduction in  
199 gain, but it failed to reach statistical significance. These findings may be limited as it was a lab

200 experiment, and as such no follow up data on the effect of these prescriptions in daily life were  
201 available. More recently, the gain needed for tinnitus suppression was investigated in a more  
202 extensive study design which was applied by Shetty & Pottackal (2019). The effect on tinnitus  
203 perception and speech understanding in noise (SPIN) was evaluated up to 30 days of hearing aid  
204 use. Their sample consisted of a very specific group, namely 20 patients who experience  
205 catastrophic tinnitus (i.e. always heard, disturbed sleep pattern and difficulty with any activity)  
206 even after being fitted with a hearing aid. A comparison between the fitting formula DSL i/o v5  
207 and NAL-NL2 showed that higher gain at the tinnitus pitch was needed for the latter formula in  
208 terms of tinnitus suppression. Interestingly, SPIN was not affected by tinnitus pitch or revised  
209 fitting formula. Moreover, these authors also found that a lower tinnitus pitch was associated  
210 with less gain needed, which is in agreement with the results by Shekhawat et al. (2013), and this  
211 association was significant. Also, in this study the gain adjustments were performed in the lab.  
212 Hence, authors of both studies recommended adjusting the gain at the tinnitus pitch using DSL  
213 (I/o) v5 for tinnitus management.

#### 214 **Predictive factors for hearing aid use resulting in tinnitus relief**

215 McNeill et al. (2012) evaluated retrospectively predictive factors for tinnitus relief in 70 patients  
216 with bothersome chronic tinnitus. The reduction in tinnitus complaints was significantly larger  
217 when participants achieved masking (i.e. hearing tinnitus softer or not at all), and masking was  
218 more likely in patients with good low-frequency hearing and a tinnitus pitch in the frequency  
219 range of the hearing aids. It is important to bear in mind that the ‘no masking’ group also had a  
220 lower tinnitus severity prior to the study. Clinical trials focusing on predictive factors for  
221 therapeutic success with hearing aids are warranted, as the tinnitus population is highly  
222 heterogeneous (Cederroth et al. 2019).

#### 223 **Enhancement of sound therapy from hearing aids**

224 Whether a combination of two existing treatments for tinnitus lead to a larger benefit was  
225 investigated by Shekhawat et al. (2014) by applying multisession transcranial direct current  
226 stimulation (tDCS) on five consecutive days before hearing-aid use. A total of 40 chronic tinnitus  
227 patients were enrolled in this 7-month during double-blind randomized clinical trial. The patients  
228 were randomized in two groups: sham vs. experimental tDCS. As the results showed a significant  
229 similar reduction in tinnitus severity for both groups, the hearing aid effects appeared  
230 independent of tDCS. Only one parameter changed after experimental tDCS, namely minimum  
231 masking levels. However, as hearing aids were fitted immediately following the tDCS sequence  
232 and the hearing aids had a strong effect, any tDCS effect might have been washed out by larger  
233 effects of sound amplification. It was recommended more recently to have a washout period of a  
234 few days between the stimulation sessions because the impact of multiple tDCS sessions on  
235 tinnitus being non-linear in nature (Shekhawat et al. 2018). Zarenoe et al. (2016) looked also into  
236 the optimization of hearing aids for tinnitus relief by adding motivational interviewing (MI) to  
237 their protocol. This pilot RCT included 50 patients with tinnitus and sensorineural hearing loss,  
238 but four patients dropped out due to dissatisfaction of hearing aid amplification. Hence, 23  
239 patients received a brief MI program as an adjunct to hearing aid rehabilitation, whereas the other  
240 patients underwent conventional hearing aid fitting. The authors succeeded in their aim as a  
241 significant larger improvement was demonstrated for the first group 3 months after completing  
242 hearing aid fitting. While these results were positive, they might have been biased by differences  
243 in hearing thresholds and tinnitus distress at baseline between both groups. It was not clear if  
244 these differences were significant. These preliminary, but promising results, should be replicated  
245 in larger trials.

#### 246 **Overview of results with amplification**

247 In summary, out of the 16 studies described above, nine studies showed significant  
248 improvements in tinnitus perception (Araujo and Iório 2016; Cabral et al. 2016; Haab et al. 2019;

249 Hodgson et al. 2015; Shekhawat et al. 2014; Yakunina et al. 2019; Yokota et al. 2020; Zarenoe et  
250 al. 2017; Zarenoe et al. 2016), while four studies did not report significant tinnitus relief  
251 (Marcrum et al. 2020; McNeill et al. 2012; Peltier et al. 2012; Strauss et al. 2015). The other three  
252 studies did not test whether hearing aids' use leads to tinnitus relief (Andersson et al. 2011;  
253 Shekhawat, Searchfield, Kobayashi, et al. 2013; Shetty and Pottackal 2019).

254

255

#### 256 Additional masking in hearing aids

257 A total of 12 articles focused on adding an additional masking function to the hearing aids in a  
258 tinnitus population.

#### 259 **Evaluation of combination devices**

##### 260 ***Additional benefit of sound generators in a hearing aid***

261 A total of 3 studies focused on the effect of combination devices (i.e. amplification and sound  
262 generator) compared to conventional amplification. In 2014, dos Santos et al. investigated if  
263 combination devices (HA + SG) were more effective than conventional amplification alone (HA)  
264 (dos Santos et al. 2014). The study design was a blind randomized clinical trial that included 49  
265 chronic tinnitus patients with a bilateral mild to moderate SNHL. The authors specified that the  
266 white noise in the sound generator was set at the lowest intensity capable of providing tinnitus  
267 relief and that the noise reduction strategies were switched off. Both groups showed significant  
268 improvements after 3 months of hearing aid use. Yet, there was no statistically significant  
269 difference between both groups. More specifically, 62.5 % of the first group (HA + SG) and 78  
270 % of the second group (HA) showed a clinically significant reduction in tinnitus annoyance (i.e. a  
271 minimal reduction of 20 points on the THI). Notably, all participants used the same hearing aids,  
272 which were developed by the University of São Paulo. One year later, a study was published by

273 Henry et al. (2015), in which a commercially available combination hearing aid (with an  
274 amplitude and frequency modulated noise stimulus) was evaluated in a study funded by Starkey  
275 Hearing Technologies. The 30 participants with bothersome tinnitus were hearing aid candidates  
276 who did not wear hearing aids in the previous 12 months. Similar to the previous study, both  
277 groups demonstrated significant improvements in terms of tinnitus distress, without a significant  
278 difference between groups. However, this study showed a trend that prioritized combination  
279 devices. Interestingly, the participants also filled out the self-report questionnaires for the  
280 situations in which they were not wearing the hearing aids. The results showed also significant  
281 improvements for those moments. Moreover, the sound generators did not result in any negative  
282 effect on hearing handicap. Similar results were found by Henry et al. (2017), who replicated this  
283 study, although the devices used were from a different manufacturer (i.e. Phonak, with three SG  
284 options: white noise, pink noise and spectrally shaped noise) and a third comparison option was  
285 added (i.e. extended-wear, deep fit hearing aids; EWHA – worn 24h/day, 7d/week). The  
286 inclusion of EWHAs was based on observations that many patients using this type of hearing aid  
287 perceived their tinnitus as less bothersome. This RCT included 55 patients with a mild to  
288 moderately-severe hearing loss and bothersome tinnitus. Moreover, hearing-specific  
289 questionnaires and a speech-in-noise test showed similar improvements in the three groups.  
290 Although not significant, the tinnitus relief was smaller for the HA only group and the hearing  
291 improvement was smaller for the EWHA group. In sum, a superiority of combination devices  
292 compared to conventional hearing aids has not been proven. On the other hand, there is also no  
293 inferiority of combination devices in terms of speech understanding demonstrated in these  
294 papers.

295 The effectiveness of a combination device (HA + SG) for 15 patients with a hearing loss was  
296 compared to a sound generator only (SG) for 15 normal hearing patients (NH) in a study by  
297 Rocha et al. (2017). All patients had bilateral chronic tinnitus, used the same hearing aid with a  
298 constant white noise and participated in a counselling session. This approach was successful as

299 both groups revealed significant improvements at six months follow-up. The authors concluded  
300 that the use of a sound generator was similarly effective for NH patients as a combination device  
301 for patients with a hearing loss. However, the results might be yet again mediated by the effect of  
302 counselling.

303 The satisfactory rates of SG, HA or SG + HA were investigated in a longitudinal study  
304 specifically focusing on war veterans with blast-induced chronic tinnitus (Jalilvand et al. 2015).  
305 More specifically, 974 patients were provided with a sound generator and a hearing aid at baseline  
306 and were followed up for two years. The satisfaction scores for HA and HA + SG increased with  
307 time, while the scores decreased for SG. This could be explained by patients tolerating the  
308 amplification better over time, resulting in more amplification and higher satisfaction rates. On  
309 the other hand, the sound generator gradually became unpleasant for the patients, according to  
310 the authors. Most patients reported to prefer a hearing aid only (HA: 84 %, HA + SG: 13.3 %,  
311 SG: 2.7 %). It is important to note that in the early years of this study (2004), hearing aids and  
312 sound generators were fitted as separate devices. As such, the number of subjects who preferred  
313 both in those times was very small. The authors did not find explaining variables such as  
314 audiological parameters or tinnitus characteristics.

315 While most studies include a control group who receive conventional amplification, sound  
316 generator, counselling or no therapy at all, Oz et al. (2013) administered betahistine to 21 patients  
317 with a primary complaint of chronic tinnitus in an RCT. A total of 12 patients received in  
318 addition a combination device or a sound generator (both with a wideband noise), depending on  
319 the hearing loss. Both groups showed positive effects on tinnitus after 3 months. It has to be  
320 noted that this study claims to be double blinded, but it is unclear how they blinded patients for  
321 using a hearing aid. Moreover, a recent Cochrane review shows that there is no evidence to  
322 suggest that betahistine has an effect on subjective idiopathic tinnitus (Wegner et al. 2018).

323 ***Benefit in terms of hearing and tinnitus***

324 Two studies included in this scoping review did not include a control group in the evaluation of  
325 combination devices. Berberian et al. (2017) evaluated bilateral use of combination devices for 6  
326 months in 25 patients with bilateral tinnitus and mild to moderately severe hearing loss. They  
327 showed significant improvements in hearing thresholds and tinnitus perception. Similarly, Rocha  
328 & Mondelli (2020) evaluated the benefit of combination devices (with white noise) over 6  
329 months. A total of 40 chronic bilateral tinnitus patients with symmetrical bilateral mild to  
330 moderate SNHL were included. Real ear measurements (REM) were performed to verify the  
331 sound generator. Significant tinnitus improvements were shown. Hence, these two studies are in  
332 agreement with previously described studies as they show positive effects of combination devices  
333 but could not contribute to the discussion whether additional masking is beneficiary.

#### 334 **Sound generator, masking, .. What's in a name?**

335 While many studies focus on the effect of sound generators and combination devices, some  
336 studies focused more on the ideal sound stimulus to provide tinnitus relief. Searchfield et al.  
337 (2016) investigated thoroughly masking at the perceived spatial location of the patient's tinnitus  
338 (i.e. 3D masking). Their paper describes three studies: a proof-of-concept study, a prototype  
339 evaluation, and a four-month crossover pilot study. A preference for the 3D masking stimulus  
340 and less preference for unilateral masking was shown. Moreover, the 3D masking did not have to  
341 be as loud as other maskers. Finally, the prototype evaluation demonstrated significant larger  
342 tinnitus improvements with the 3D masking.

343 A sound therapy introduced by Widex is called Zen Tones, which uses music that is generated  
344 based on a fractal algorithm. Adjustments can be made in terms of volume, pitch, and tempo.  
345 Moreover, automatic adjustments are made based on the ambient noise in the environment. A  
346 pilot study with the Widex Zen Tinnitus Therapy was performed in 2017 by Tyler et al.,  
347 evaluating the progression of benefits in 20 chronic tinnitus patients receiving counselling,  
348 hearing aids, tinnitus activities and Zen therapy. They demonstrated that all participants

349 significantly benefited from this approach. Large benefits were observed following the last two  
350 elements of the treatment. It is important to bear in mind that seven patients were already  
351 hearing aid users, and that not all patients needed the same amount and type of appointments.  
352 An evaluation of the additional benefit of Zen tones was conducted by Shabana et al. (2018) with  
353 40 chronic tinnitus patients with a SNHL. Also, in this study the patients followed first 2 months  
354 of counselling before using hearing aids for 4 months. Zen tones were made available for 20  
355 participants (i.e. study group). Significant improvements were only demonstrated after  
356 counselling and amplification. Yet, a significantly greater benefit was apparent for the study  
357 group. It has to be noted that all patients were fitted monaurally for financial reasons.

358 A pre-market version of Oticon Alta with a tinnitus sound generator was evaluated in a feasibility  
359 study of Sereda et al. (2017). The eight participants, who were experienced and satisfied hearing  
360 aid users with chronic tinnitus, could select different types of noise (i.e. white/pink/brown,  
361 unmodulated or modulated, non-filtered or bandpassed) and three different ocean sounds.  
362 Participants reported to be satisfied with the feeling of control and the variations possible. As can  
363 be expected, preferences depended on the individual and the situation. Yet, participants reported  
364 that the broadband noise was the most effective masker and the ocean noises were more  
365 distracting and/or relaxing. In general, combination devices were equally preferred over the  
366 conventional amplification.

### 367 **Overview of results with additional masking**

368 Tinnitus complaints significantly decreased in ten studies (Berberian et al. 2017; dos Santos et al.  
369 2014; Henry et al. 2015; Henry et al. 2017; Oz et al. 2013; Rocha and Mondelli 2017, 2020;  
370 Searchfield et al. 2016; Shabana et al. 2018; Tyler et al. 2017). Two studies did not conduct  
371 analyses to investigate if hearing aid use and/or the masking function result into tinnitus relief  
372 (Jalilvand et al. 2015; Sereda et al. 2017).

### 373 **Discussion**



374 In view of all that has been mentioned so far, one may suppose that hearing aid use improves  
375 tinnitus perception. However, the quality of evidence could be questioned. Nevertheless, recent  
376 studies were more likely to focus on (1) optimizing the effect of hearing aids, by investigating  
377 different forms of amplification, and (2) better predicting which tinnitus patients benefit from  
378 hearing aids.

379 When optimizing tinnitus relief through hearing aid use, it is important to bear in mind that  
380 hearing aid fitting for chronic tinnitus patients can be challenging, as they require different fitting  
381 strategies. These patients might show increased aversiveness and decreased benefit in difficult  
382 listening situations with a hearing aid (Andersson et al. 2011). Decreased gain might be needed,  
383 specifically with patients who experience a lower tinnitus pitch. More advanced strategies, such as  
384 notch filter amplification and frequency lowering, demonstrate promising results, though the  
385 added benefits are still debated. Similarly, the addition of sound generators in a combination  
386 device has resulted in tinnitus improvement without a clear added benefit compared to  
387 conventional amplification. Jalilvand et al. in 2015 stated that amplification might be better  
388 tolerated over time, while sound generators might gradually become unpleasant (Jalilvand et al.  
389 2015). The ideal noise settings probably depend on the individual patient and the situation.  
390 Furthermore, while there is a general preference for the use of binaural hearing aids in tinnitus  
391 patients, monaural hearing aids have also provided positive results, calling attention to cost-  
392 efficiency (Shabana et al. 2018; Yokota et al. 2020).

393 Predicting those who can most benefit from hearing aids in terms of tinnitus experience remains  
394 a challenge. Mc Neill et al. in 2012 found that patients with good low-frequency hearing and a  
395 tinnitus pitch in the frequency range of the hearing aids might perceive a larger tinnitus  
396 improvement (McNeill et al. 2012). It is clear that, as most studies apply different amplification  
397 protocols and reach significant improvements, more research is needed to uncover what works  
398 for whom.

399 The use of digital noise reduction and adaptive directional microphone systems has also been  
400 discussed in some studies, as they might reduce the potential impact of hearing aid use on  
401 tinnitus severity. The idea behind switching these digital features off is that continuous exposure  
402 to ambient noise levels may lead to reduction of gain in the auditory pathway. However, these  
403 features might be needed for beneficial effects in terms of hearing (dos Santos et al. 2014;  
404 Marcum et al. 2020; McNeill et al. 2012; Shekhawat, Searchfield, Kobayashi, et al. 2013; Shetty  
405 and Pottackal 2019). Unfortunately, this topic was not further investigated since 2011 to our  
406 knowledge.

407 Another ongoing debate concerns the degree of tinnitus complaints when the hearing aid is  
408 switched off (for a few hours or even longer). While this topic was also not specifically  
409 investigated in the retrieved studies, some authors have discussed the matter. Most of them  
410 reported smaller positive results without the hearing aid device (Araujo and Iório 2016; Henry et  
411 al. 2015). Nevertheless, Yakunina et al. (2019) reported that the tinnitus improvements lasted for  
412 at least 3 months after 3 months of hearing aid use. Hence, these authors suggest that the  
413 mechanism of tinnitus suppression is beyond temporary masking and distraction. Another  
414 possible explanation is the effect of counseling, which was often part of the treatment in the  
415 reported studies, and this effect is not dependent on wearing the hearing aid or not. While for  
416 research purposes including counseling influences the results, in clinical practice it is often part of  
417 the multidisciplinary approach.

418 The findings of the current scoping review may be somewhat limited by the quality of the  
419 presented studies. First, some studies did not investigate the standalone effect of hearing aids, as  
420 they provided other treatments during the study (e.g. counselling) and/or did not include a  
421 control group. Moreover, some studies analyzed clinical gathered data, without a prospective  
422 fixed protocol, which impedes the formation of strong conclusions.

423 **Consultation exercise**

424 Practitioners and patients' view on the current topic are a final, but valuable, stage of the current  
425 scoping review. In a Delphi review of 2015, including 19 UK hearing professionals, Sereda and  
426 colleagues found that the presence of bothersome tinnitus supported the choice for hearing aids  
427 in patients with hearing difficulties and realistic expectations of this technology. Moreover, 'open-  
428 fit technology' and 'bilateral fitting' were part of the usual care for bothersome tinnitus. However,  
429 the authors stated that a clear link between diagnostic information and recommended treatment  
430 was lacking, as well as specific guidelines and recommended questionnaires (Sereda et al. 2015).  
431 For the current study, seven experts in the field (i.e. 3 audiology researchers, 1 clinical audiologist  
432 with expertise in hearing aid fitting for tinnitus, 1 tinnitus consultant and 2 representatives of a  
433 patient association) were consulted about the study findings. In general, the findings were in  
434 agreement with their view on the scientific evidence of hearing aids for tinnitus and they also  
435 emphasized the importance for RCTs in order to reach consensus. The input of the experts is  
436 summarized in the following points:

437 1) The high variability in effects on tinnitus perception is similar to the experiences in  
438 clinical practice, especially at first. Fitting and adjusting seems to take longer in this  
439 population. It is important to further explore which patients can benefit from hearing aid  
440 fitting (e.g. role of age, tinnitus pitch, personality, distress, sleeping problems, coping,  
441 motivation, expectations) and what 'motivational interviewing' can contribute to this  
442 issue. Moreover, several questions remain on the fitting method itself (e.g. importance of  
443 comfort, sound quality, REM). Consequently, this could support development of  
444 guidelines for clinicians, as well as for patient associations.

445 2) The use of sound generators is often temporarily and in combination with  
446 psychoeducation. Patients often report the relaxation effect of these additional sounds.  
447 Hence, the question arises which sound stimuli should be used (e.g. music, nature sounds,  
448 pure stimuli, etc). With regards to combination devices, datalogging is needed to uncover

449 how long patients use different programs and in which situations. As patients often  
450 report an aggravation of tinnitus after switching the masking off, the risk of sound  
451 generators interfering with the habituation process came up in this consultation phase  
452 and should be the topic of future research.

453

454 3) As counseling is often an essential part of a multidisciplinary approach, the experts  
455 recommended future studies to focus on the content and the extent of the counseling  
456 needed in a hearing aid fitting. Excluding counseling might lead to counterproductive  
457 effects in their opinion.

458 4) More attention should be given to the different hearing losses (e.g. type and degree of  
459 hearing loss) and the effects of different hearing solutions needed, as well as the  
460 relationship between the change in audibility/listening effort and the change in tinnitus  
461 perception.

## 462 **Conclusions**

463 As there is a long history of clinical work and research on hearing aids for tinnitus relief, there  
464 was a need for recent literature to be reviewed and guide decision making in tinnitus  
465 management. Moreover, a consultation exercise, which is an essential stage of a scoping review,  
466 was included. The majority of the studies supported the use of hearing aids for tinnitus relief,  
467 however, the quality of evidence is low, limiting the confidence in the scientific support. The  
468 experts stated that the findings were in agreement with their view on the scientific evidence and  
469 they emphasized the importance of reaching consensus. While a stronger methodology is  
470 recommended, future studies should determine the optimal hearing solution for sound  
471 amplification and sound generation in tinnitus patients. More attention needs to be brought on  
472 how it should be fitted and the ideal parameters, as well as on how this can be part of a larger  
473 multidisciplinary approach. Finally, the underlying working mechanisms must be further

474 explored, more specifically in order to understand the effect of switching off the hearing aid at  
475 night and the predictive factors for therapy success.

476

## 477 **ACKNOWLEDGMENTS**

478 We gratefully acknowledge the valuable input of the experts of the consultation stage,  
479 Prof. dr. David Baguley, drs. Rene van der Wilk, Nancy Van Looveren, Prof. dr. Vinaya  
480 Manchaiah, Prof. dr. Annick Gilles, Bert Lecomte and Wout De Coster.

## 481 **References**

- 482 Andersson, G., Keshishi, A., Baguley, D. M. (2011). Benefit from hearing aids in users with and  
483 without tinnitus. *Audiological Medicine*, *9*, 73-78.
- 484 Araujo, T. d. M., Lório, M. C. M. (2016). Effects of sound amplification in self-perception of tinnitus  
485 and hearing loss in the elderly. *Brazilian Journal of Otorhinolaryngology*, *82*, 289-296.
- 486 Arksey, H., O'Malley, L. (2005). Scoping studies: towards a methodological framework. *International*  
487 *Journal of Social Research Methodology*, *8*, 19-32.
- 488 Axelsson, A., Ringdahl, A. (1989). Tinnitus—a study of its prevalence and characteristics. *British*  
489 *Journal of Audiology*, *23*, 53-62.
- 490 Baguley, D., McFerran, D., Hall, D. (2013). Tinnitus. *Lancet*, *382*, 1600-1607.
- 491 Beck, D. L. (2011). Hearing aid amplification and tinnitus: 2011 overview. *64*, 12-14.
- 492 Berberian, A. P., Ribas, A., Imlau, D., et al. (2017). Benefit of Using the Prosthesis with Sound  
493 Generators in Individuals with Tinnitus Associated With Mild to Moderately Severe Hearing  
494 Loss. *Int Tinnitus J*, *20*, 64-68.
- 495 Cabral, J., Tonocchi, R., Ribas, Â., et al. (2016). The efficacy of hearing aids for emotional and auditory  
496 tinnitus issues. *Int Tinnitus J*, *20*, 54-58.
- 497 Cederroth, C. R., Gallus, S., Hall, D. A., et al. (2019). Editorial: Towards an Understanding of Tinnitus  
498 Heterogeneity. *Front Aging Neurosci*, *11*, 53.
- 499 Coles, R. R. A., Hallam, R. S. (1987). Tinnitus and its management. *British Medical Bulletin*, *43*, 983-  
500 998.
- 501 dos Santos, G. M., Bento, R. F., de Medeiros, I. R., et al. (2014). The influence of sound generator  
502 associated with conventional amplification for tinnitus control: randomized blind clinical trial.  
503 *Trends Hear*, *18*.
- 504 Eggermont, J. J. (2008). The role of sound in adult and developmental auditory cortical plasticity. *Ear*  
505 *Hear*, *29*, 819-829.
- 506 Haab, L., Lehser, C., Corona-Strauss, F. I., et al. (2019). Implementation and Long-Term Evaluation of  
507 a Hearing Aid Supported Tinnitus Treatment Using Notched Environmental Sounds. *IEEE J*  
508 *Transl Eng Health Med*, *7*, 1600109.
- 509 Henry, J. A., Frederick, M., Sell, S., et al. (2015). Validation of a Novel Combination Hearing Aid and  
510 Tinnitus Therapy Device. *Ear and Hearing*, *36*.
- 511 Henry, J. A., McMillan, G., Dann, S., et al. (2017). Tinnitus Management: Randomized Controlled Trial  
512 Comparing Extended-Wear Hearing Aids, Conventional Hearing Aids, and Combination  
513 Instruments. *J Am Acad Audiol*, *28*, 546-561.
- 514 Hoare, D. J., Edmondson-Jones, M., Sereda, M., et al. (2014). Amplification with hearing aids for  
515 patients with tinnitus and co-existing hearing loss. *Cochrane Database Syst Rev*, Cd010151.

- 516 Hobson, J., Chisholm, E., El Refaie, A. (2012). Sound therapy (masking) in the management of tinnitus  
517 in adults. *Cochrane Database Syst Rev*, *11*, Cd006371.
- 518 Hodgson, S. A., Herdering, R., Singh Shekhawat, G., et al. (2015). A crossover trial comparing wide  
519 dynamic range compression and frequency compression in hearing aids for tinnitus therapy.  
520 *Disabil Rehabil Assist Technol*, *12*, 97-103.
- 521 Jacquemin, L., Luyten, T. R., Van Looveren, N., et al. (2020). Bimodal Therapy for Chronic Subjective  
522 Tinnitus: A Randomized Controlled Trial of EMDR and TRT Versus CBT and TRT. *11*.
- 523 Jalilvand, H., Pourbakht, A., Haghani, H. (2015). Hearing aid or tinnitus masker: which one is the best  
524 treatment for blast-induced tinnitus? The results of a long-term study on 974 patients. *Audiol  
525 Neurootol*, *20*, 195-201.
- 526 Jastreboff, P. J. (1990). Phantom auditory perception (tinnitus): mechanisms of generation and  
527 perception. *Neurosci Res*, *8*, 221-254.
- 528 Jastreboff, P. J., Hazell, J. W. (1993). A neurophysiological approach to tinnitus: clinical implications.  
529 *Br J Audiol*, *27*, 7-17.
- 530 Jastreboff, P. J., Jastreboff, M. M. (2000). Tinnitus Retraining Therapy (TRT) as a method for  
531 treatment of tinnitus and hyperacusis patients. *J Am Acad Audiol*, *11*, 162-177.
- 532 Marcum, S. C., Picou, E. M., Steffens, T., et al. (2020). Conventional versus notch filter amplification  
533 for the treatment of tinnitus in adults with mild-to-moderate hearing loss. In *Progress in  
534 Brain Research: Elsevier*.
- 535 Mays, N., Roberts, E., Popay, J. (2001). Synthesising research evidence. In *Studying the Organisation  
536 and Delivery of Health Services: Research Methods*. London: Routledge.
- 537 McNeill, C., Távora-Vieira, D., Alnafjan, F., et al. (2012). Tinnitus pitch, masking, and the effectiveness  
538 of hearing aids for tinnitus therapy. *International Journal of Audiology*, *51*, 914-919.
- 539 Noreña, A. J. (2011). An integrative model of tinnitus based on a central gain controlling neural  
540 sensitivity. *Neurosci Biobehav Rev*, *35*, 1089-1109.
- 541 Noreña, A. J., Eggermont, J. J. (2005). Enriched acoustic environment after noise trauma reduces  
542 hearing loss and prevents cortical map reorganization. *J Neurosci*, *25*, 699-705.
- 543 Oz, I., Arslan, F., Hizal, E., et al. (2013). Effectiveness of the combined hearing and masking devices on  
544 the severity and perception of tinnitus: a randomized, controlled, double-blind study. *ORL J  
545 Otorhinolaryngol Relat Spec*, *75*, 211-220.
- 546 Peltier, E., Peltier, C., Tahar, S., et al. (2012). Long-Term Tinnitus Suppression with Linear Octave  
547 Frequency Transposition Hearing Aids. *PLOS ONE*, *7*, e51915.
- 548 Rocha, A. V., Mondelli, M. F. C. G. (2017). Sound generator associated with the counseling in the  
549 treatment of tinnitus: evaluation of the effectiveness. *Braz J Otorhinolaryngol*, *83*, 249-255.
- 550 Rocha, A. V., Mondelli, M. F. C. G. (2020). Applicability of the real ear measurement for audiological  
551 intervention of tinnitus. *Brazilian Journal of Otorhinolaryngology*, *86*, 14-22.
- 552 Saltzman, M., Ersner, M. S. (1947). A hearing aid for the relief of tinnitus aurium. *Laryngoscope*, *57*,  
553 358-366.
- 554 Searchfield, G. D., Kobayashi, K., Hodgson, S.-A., et al. (2016). Spatial masking: Development and  
555 testing of a new tinnitus assistive technology. *Assistive Technology*, *28*, 115-125.
- 556 Sereda, M., Davies, J., Hall, D. A. (2017). Pre-market version of a commercially available hearing  
557 instrument with a tinnitus sound generator: feasibility of evaluation in a clinical trial. *Int J  
558 Audiol*, *56*, 286-294.
- 559 Sereda, M., Hoare, D. J., Nicholson, R., et al. (2015). Consensus on Hearing Aid Candidature and  
560 Fitting for Mild Hearing Loss, With and Without Tinnitus: Delphi Review. *Ear Hear*, *36*, 417-  
561 429.
- 562 Sereda, M., Xia, J., El Refaie, A., et al. (2018). Sound therapy (using amplification devices and/or  
563 sound generators) for tinnitus. *Cochrane Database Syst Rev*, *12*, Cd013094.
- 564 Shabana, M. I., Dabbous, A. O., Abdelmajeed, M. A., et al. (2018). 'Counselling and amplification with  
565 and without fractal music (Zen tones) for management of patients suffering from hearing loss  
566 and tinnitus'. *Hearing, Balance and Communication*, *16*, 41-55.

- 567 Shekhawat, G. S., Searchfield, G. D., Kobayashi, K., et al. (2013). Prescription of hearing-aid output for  
568 tinnitus relief. *Int J Audiol*, *52*, 617-625.
- 569 Shekhawat, G. S., Searchfield, G. D., Stinear, C. M. (2013). Role of hearing AIDs in tinnitus  
570 intervention: a scoping review. *J Am Acad Audiol*, *24*, 747-762.
- 571 Shekhawat, G. S., Searchfield, G. D., Stinear, C. M. (2014). Randomized Trial of Transcranial Direct  
572 Current Stimulation and Hearing Aids for Tinnitus Management. *Neurorehabil Neural Repair*,  
573 *28*, 410-419.
- 574 Shekhawat, G. S., Vanneste, S. (2018). Optimization of Transcranial Direct Current Stimulation of  
575 Dorsolateral Prefrontal Cortex for Tinnitus: A Non-Linear Dose-Response Effect. *Scientific*  
576 *Reports*, *8*, 8311.
- 577 Shetty, H. N., Pottackal, J. M. (2019). Gain adjustment at tinnitus pitch to manage both tinnitus and  
578 speech perception in noise. *J Otol*, *14*, 141-148.
- 579 Strauss, D. J., Corona-Strauss, F. I., Seidler, H., et al. (2015). Notched environmental sounds: a new  
580 hearing aid-supported tinnitus treatment evaluated in 20 patients. *42*, 172-175.
- 581 Surr, R. K., Montgomery, A. A., Mueller, H. G. (1985). Effect of amplification on tinnitus among new  
582 hearing aid users. *Ear Hear*, *6*, 71-75.
- 583 Sweetow, R. W., Sabes, J. H. (2010). Effects of acoustical stimuli delivered through hearing aids on  
584 tinnitus. *J Am Acad Audiol*, *21*, 461-473.
- 585 Sweetow, R. W., Sabes, J. H. (2010). An overview of common procedures for the management of  
586 tinnitus patients. *63*, 11-12,14-15.
- 587 Tass, P. A., Adamchic, I., Freund, H. J., et al. (2012). Counteracting tinnitus by acoustic coordinated  
588 reset neuromodulation. *Restor Neurol Neurosci*, *30*, 137-159.
- 589 Tutaj, L., Hoare, D. J., Sereda, M. (2018). Combined Amplification and Sound Generation for Tinnitus:  
590 A Scoping Review. *Ear Hear*, *39*, 412-422.
- 591 Tyler, R., S., Deshpande Aniruddha, K., Lau Chi, C., et al. (2017). The Effectiveness of the Progression  
592 of Widex Zen Tinnitus Therapy: A Pilot Study. *American Journal of Audiology*, *26*, 283-292.
- 593 Van der Wal, A., Luyten, T., Cardon, E., et al. (2020). Sex Differences in the Response to Different  
594 Tinnitus Treatment. *14*.
- 595 Vernon, J., Silverstein, H., Norrell, H. (1976). The use of masking for relief of tinnitus. *Neurological*  
596 *Surgery of the Ear*, *2*, 104-118.
- 597 Vernon, J. A., Meikle, M. B. (2003). Masking devices and alprazolam treatment for tinnitus.  
598 *Otolaryngol Clin North Am*, *36*, 307-320, vii.
- 599 Wegner, I., Hall, D. A., Smit, A. L., et al. (2018). Betahistine for tinnitus. *Cochrane Database Syst Rev*,  
600 *12*, Cd013093.
- 601 Yakunina, N., Lee, W. H., Ryu, Y. J., et al. (2019). Tinnitus Suppression Effect of Hearing Aids in  
602 Patients With High-frequency Hearing Loss: A Randomized Double-blind Controlled Trial. *Otol*  
603 *Neurotol*, *40*, 865-871.
- 604 Yokota, Y., Yamashita, A., Koyama, S., et al. (2020). Retrospective evaluation of secondary effects of  
605 hearing aids for tinnitus therapy in patients with hearing loss. *Auris Nasus Larynx*, *47*, 763-  
606 768.
- 607 Zarenoe, R., Hällgren, M., Andersson, G., et al. (2017). Working Memory, Sleep, and Hearing  
608 Problems in Patients with Tinnitus and Hearing Loss Fitted with Hearing Aids. *J Am Acad*  
609 *Audiol*, *28*, 141-151.
- 610 Zarenoe, R., Söderlund, L. L., Andersson, G., et al. (2016). Motivational Interviewing as an Adjunct to  
611 Hearing Rehabilitation for Patients with Tinnitus: A Randomized Controlled Pilot Trial. *J Am*  
612 *Acad Audiol*, *27*, 669-676.

613

614 **Figure legends**

615 Figure 1: Flowchart of the study selection

616 Figure 2: Chart of the percentage of studies presenting a significant, positive effect for tinnitus,

617 no significant effect, or not applicable due to study aims.



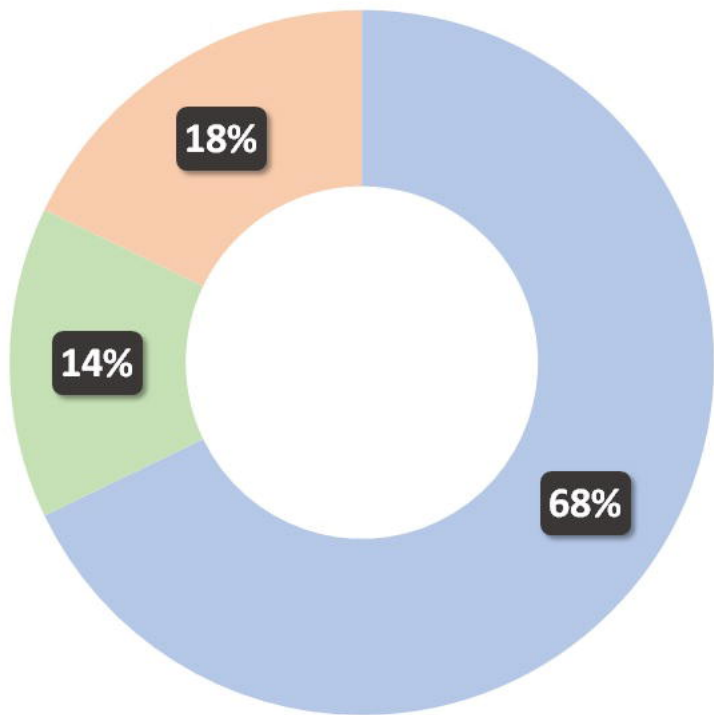

■ Positive effect

■ No effect

■ NA

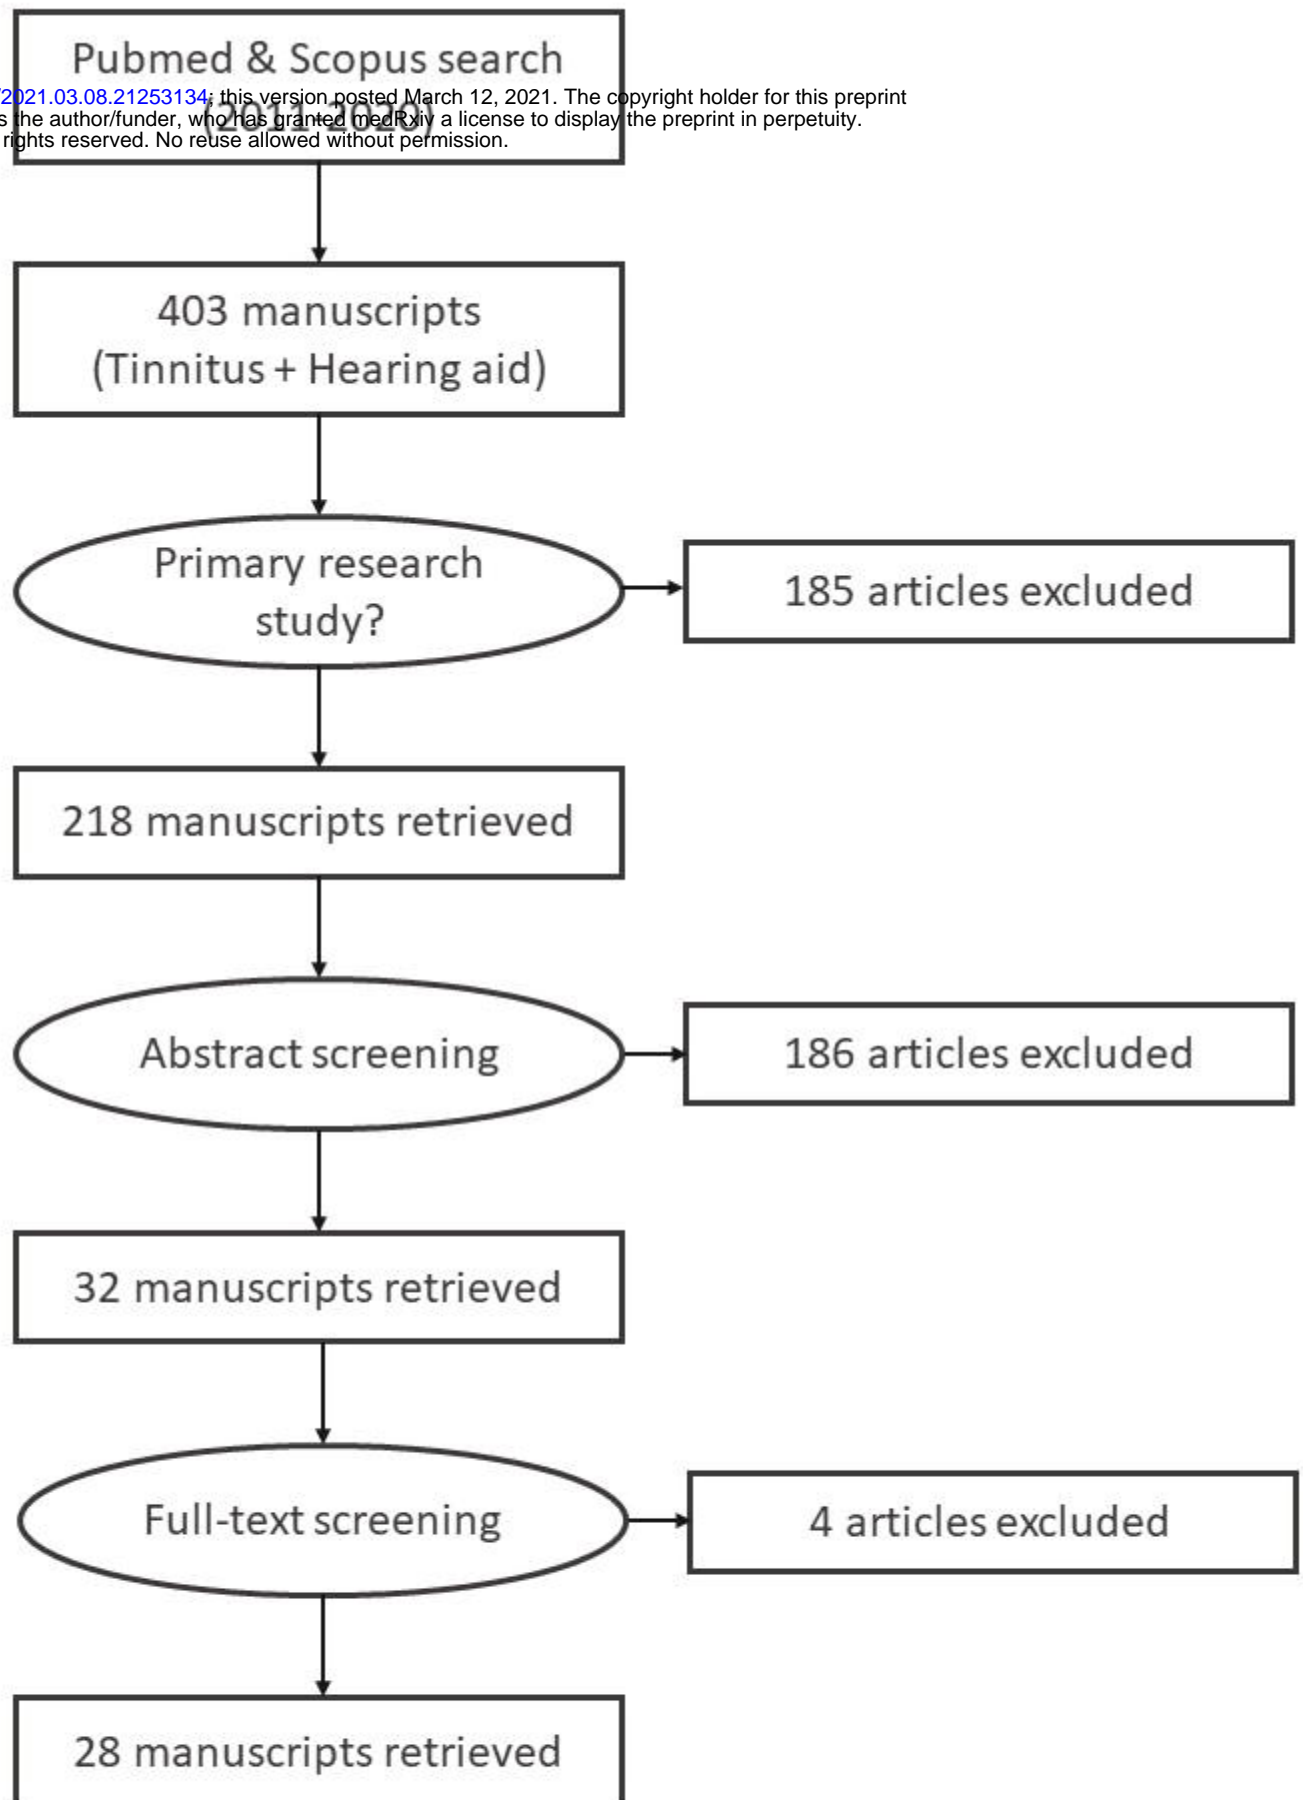

Table 1: Overview of selected studies for this scoping review (HA, hearing aid; SG: sound generator)

| First author | Year | Control group    | Fitting                  | SG? | Combined therapies  | Sample size | Participants                                                      | Tinnitus effect?           | Study design  | Methodology                                                                   |
|--------------|------|------------------|--------------------------|-----|---------------------|-------------|-------------------------------------------------------------------|----------------------------|---------------|-------------------------------------------------------------------------------|
| Andersson    | 2011 | No tinnitus      | NA                       | No  | No                  | 85          | HA users with and without tinnitus                                | NA                         | Retrospective | Cross-sectional, response rate 53%, low tinnitus distress                     |
| Peltier      | 2012 | None             | LOFT                     | No  | No                  | 74          | Tinnitus, HF HL                                                   | No                         | Retrospective | No fixed time points, no clear inclusion and exclusion criteria               |
| MCNeill      | 2012 | None             | NA                       | No  | No                  | 70          | Bothersome chronic tinnitus                                       | No                         | Retrospective |                                                                               |
| Oz           | 2013 | Only betahistine | NAL-NL1, WB noise        | Yes | Counseling          | 21          | Primary complaint chronic tinnitus                                | Yes, no group differences  | Prospective   | RCT, all received betahistine, combination device or sound generator          |
| Shekhawat    | 2013 | None             | DSL5                     | No  | No                  | 25          | HA candidates, chronic tinnitus                                   | NA                         | Experimental  | One time point, no follow up                                                  |
| Shekhawat    | 2014 | Sham tDCS        | DSL5                     | No  | tDCS                | 40          | Chronic tinnitus                                                  | Yes                        | Prospective   | Same HA, no washout period                                                    |
| dos Santos   | 2014 | Conventional     | NAL-NL1, White noise     | Yes | Counseling          | 49          | Chronic tinnitus and mild to moderate bilateral SNHL              | Yes, no group differences  | Prospective   | Blind RCT, Same HA                                                            |
| Hodgson      | 2015 | WDRC             | DSL5, FC                 | No  | Counseling          | 16          | Chronic tinnitus and HF SNHL                                      | Yes, no group differences  | Prospective   | Single-blind crossover trial                                                  |
| Henry        | 2015 | Conventional     | NAL-NL2, AM and FM noise | Yes | Counseling          | 30          | Bothersome tinnitus, hearing candidate                            | Yes, no group differences  | Prospective   |                                                                               |
| Strauss      | 2015 | Conventional     | Notch                    | No  | TRT                 | 20          | Tonal tinnitus                                                    | No                         | Prospective   | Double-blind study, objective outcome measure                                 |
| Jalilvand    | 2015 | Conventional     | NAL-NL1                  | Yes | No                  | 974         | Blast-induced chronic tinnitus                                    | NA                         | Longitudinal  | All started with combination device                                           |
| Araujo       | 2016 | No tinnitus      | NA                       | No  | Tinnitus counseling | 24          | Elderly, moderate SNHL, with and without tinnitus                 | Yes                        | Prospective   | Same HA, only women with tinnitus                                             |
| Zarenoe      | 2016 | No MI            | NA                       | No  | No                  | 46          | Tinnitus, SNHL                                                    | Yes, larger effect for MI* | Prospective   | RCT, no stratification                                                        |
| Cabral       | 2016 | None             | NA                       | No  | No                  | 17          | HA users, tinnitus                                                | Yes                        | Observational | Not all persistent tinnitus (only 58%), different questionnaires pre vs. post |
| Sereda       | 2016 | None             | NA                       | Yes | No                  | 8           | Experienced, satisfied combination device users, chronic tinnitus | NA                         | Prospective   | Same HA                                                                       |

|             |      |                         |                      |     |                        |    |                                                                              |                                   |               |                                                                                |
|-------------|------|-------------------------|----------------------|-----|------------------------|----|------------------------------------------------------------------------------|-----------------------------------|---------------|--------------------------------------------------------------------------------|
| Searchfield | 2016 | TRT-based sound therapy | DSL5, 3D masking     | Yes | Counseling             | 9  | Chronic unilateral tinnitus, mild to moderate HF SNHL                        | Yes, no group differences         | Prospective   | Same HA, cross over trial                                                      |
| Berberian   | 2016 | None                    | NA                   | Yes | No                     | 25 | Bilateral HA users + SG with bilateral tinnitus, no severe to profound HL.   | Yes                               | Retrospective |                                                                                |
| Rocha       | 2017 | Sound generator         | NAL-NL1, White noise | Yes | Counseling             | 30 | Bilateral chronic tinnitus                                                   | Yes, no group differences         | Prospective   | Same HA brand and model                                                        |
| Zarenoe     | 2017 | No tinnitus             | NA                   | No  | No                     | 92 | Mild to moderate SNHL, with and without tinnitus                             | Yes                               | Prospective   | Motivational interviewing was delivered to some patients (Zarenoe et al, 2016) |
| Tyler       | 2017 | None                    | Zen tones            | Yes | Zen Tinnitus Therapy   | 20 | Chronic tinnitus                                                             | Yes                               | Prospective   | Same brand, not everybody same trajectory, n = 7 already HA before study       |
| Henry       | 2017 | Conventional            | NAL-NL2, EHWA        | Yes | Counseling             | 55 | Mild to moderately-severe hearing loss, bothersome tinnitus                  | Yes, no group differences         | Prospective   | RCT, same brand                                                                |
| Shabana     | 2018 | Conventional            | Zen tones            | Yes | Counseling, Relaxation | 40 | SNHL, chronic bothersome tinnitus                                            | Yes, larger effect for Zen tones* | Prospective   | Monoaurally fitted, same brand                                                 |
| Yakunina    | 2019 | WDRC                    | FT vs. LFT           | No  | No                     | 94 | Chronic tinnitus, SNHL                                                       | Yes, no group differences         | Prospective   | Double-blind RCT, same brand                                                   |
| Shetty      | 2019 | None                    | NAL-NL2 or DSL5      | No  | No                     | 20 | Catastrophic tinnitus (even with HA), bilateral SNHL                         | NA                                | Prospective   | Test of tinnitus suppression during fitting, SPIN material validated?          |
| Haab        | 2019 | Conventional            | Notch                | No  | No                     | 34 | Subjective chronic tonal tinnitus, mild to moderate HL                       | Group differences at 6m*          | Prospective   |                                                                                |
| Yokota      | 2020 | None                    | NA                   | No  | No                     | 66 | Primary complaint hearing disturbance, tinnitus                              | Yes                               | Retrospective |                                                                                |
| Marcum      | 2020 | Conventional            | Notch                | No  | No                     | 39 | Primary complaint of stable, tonal tinnitus, bilateral mild-to-moderate SNHL | No                                | Prospective   | Double blind                                                                   |
| Rocha       | 2020 | None                    | NAL-NL1, White noise | Yes | Counseling             | 40 | Chronic bilateral tinnitus and symmetrical bilateral mild to moderate SNHL   | Yes                               | Prospective   | Same HA                                                                        |
